# Supplementary material for: Cyclin-dependent kinase 5 (CDK5) regulates the circadian clock
Source: eLife. 2019 Nov 5;8:e50925. doi: 10.7554/eLife.50925 (PMC6890458; doi:10.7554/eLife.50925)
Supplement: Supplementary file 1. — The serine at position 394 stands out as the best localized phosphorylation site within a CDK5 consensus motif with a high peptide score (highlighted in yellow). The colored diagram shows the structural elements of PER2 (1–576) with the S394 phosphorylation site indicated. PEP: posterior error probability; Loc. Prob.; localization probability. [file elife-50925-supp1.xlsx]

## Sheet: Phospho (STY)Sites
Proteins	Positions within proteins	Leading proteins	Protein	Protein names	Gene names	Fasta headers	Localization prob	PEP	Score	Amino acid	Phospho (STY) Probabilities	Intensity w	Intensity wo	id
O54943	544	O54943	O54943	Period circadian protein homolog 2	Per2	>sp|O54943|PER2_MOUSE Period circadian protein homolog 2 OS=Mus musculus GN=Per2 PE=1 SV=3	0.799437	0.0052144	64.705	S	EASVAEMQS(0.799)S(0.2)PPAQVK	1331700	318480	6
O54943	545	O54943	O54943	Period circadian protein homolog 2	Per2	>sp|O54943|PER2_MOUSE Period circadian protein homolog 2 OS=Mus musculus GN=Per2 PE=1 SV=3	0.971174	0	269.85	S	EASVAEMQS(0.029)S(0.971)PPAQVK	254760000	0	7
O54943	394	O54943	O54943	Period circadian protein homolog 2	Per2	>sp|O54943|PER2_MOUSE Period circadian protein homolog 2 OS=Mus musculus GN=Per2 PE=1 SV=3	1	0	254.82	S	ILQAGGQPFDYS(1)PIR	218130000	0	8
O54943	68	O54943	O54943	Period circadian protein homolog 2	Per2	>sp|O54943|PER2_MOUSE Period circadian protein homolog 2 OS=Mus musculus GN=Per2 PE=1 SV=3	0.775091	1.7899e-22	107.78	S	MLVES(0.775)S(0.17)NT(0.059)HPS(0.996)PDDAFR	5396800	0	9
O54943	69	O54943	O54943	Period circadian protein homolog 2	Per2	>sp|O54943|PER2_MOUSE Period circadian protein homolog 2 OS=Mus musculus GN=Per2 PE=1 SV=3	0.997904	0	277.25	S	MLVES(0.001)S(0.998)NT(0.001)HPSPDDAFR	193860000	3315600	10
O54943	74	O54943	O54943	Period circadian protein homolog 2	Per2	>sp|O54943|PER2_MOUSE Period circadian protein homolog 2 OS=Mus musculus GN=Per2 PE=1 SV=3	0.996316	1.7899e-22	107.78	S	MLVES(0.775)S(0.17)NT(0.059)HPS(0.996)PDDAFR	9605100	0	11
O54943	13	O54943	O54943	Period circadian protein homolog 2	Per2	>sp|O54943|PER2_MOUSE Period circadian protein homolog 2 OS=Mus musculus GN=Per2 PE=1 SV=3	0.437023	8.04873e-19	141.6	S	NGYVDFSPS(0.074)PT(0.392)S(0.437)PT(0.097)K	0	0	12
O54943	241	O54943	O54943	Period circadian protein homolog 2	Per2	>sp|O54943|PER2_MOUSE Period circadian protein homolog 2 OS=Mus musculus GN=Per2 PE=1 SV=3	0.405232	2.34176e-14	83.423	T	FVEFLAPHDVS(0.005)VFHS(0.094)Y(0.079)T(0.405)T(0.405)PY(0.011)K	0	0	19
O54943	242	O54943	O54943	Period circadian protein homolog 2	Per2	>sp|O54943|PER2_MOUSE Period circadian protein homolog 2 OS=Mus musculus GN=Per2 PE=1 SV=3	0.405232	2.34176e-14	83.423	T	FVEFLAPHDVS(0.005)VFHS(0.094)Y(0.079)T(0.405)T(0.405)PY(0.011)K	0	0	20
O54943	332	O54943	O54943	Period circadian protein homolog 2	Per2	>sp|O54943|PER2_MOUSE Period circadian protein homolog 2 OS=Mus musculus GN=Per2 PE=1 SV=3	0.826097	2.84526e-24	134.47	T	IFT(0.826)T(0.147)T(0.026)HT(0.001)PNCLFQAVDER	23444000	0	21
O54943	333	O54943	O54943	Period circadian protein homolog 2	Per2	>sp|O54943|PER2_MOUSE Period circadian protein homolog 2 OS=Mus musculus GN=Per2 PE=1 SV=3	0.25	0.000871638	49.537	T	IFT(0.25)T(0.25)T(0.25)HT(0.25)PNCLFQAVDER	0	0	22
O54943	334	O54943	O54943	Period circadian protein homolog 2	Per2	>sp|O54943|PER2_MOUSE Period circadian protein homolog 2 OS=Mus musculus GN=Per2 PE=1 SV=3	0.25	0.000871638	49.537	T	IFT(0.25)T(0.25)T(0.25)HT(0.25)PNCLFQAVDER	0	0	23
O54943	336	O54943	O54943	Period circadian protein homolog 2	Per2	>sp|O54943|PER2_MOUSE Period circadian protein homolog 2 OS=Mus musculus GN=Per2 PE=1 SV=3	0.25	0.000871638	49.537	T	IFT(0.25)T(0.25)T(0.25)HT(0.25)PNCLFQAVDER	0	0	24
O54943	71	O54943	O54943	Period circadian protein homolog 2	Per2	>sp|O54943|PER2_MOUSE Period circadian protein homolog 2 OS=Mus musculus GN=Per2 PE=1 SV=3	0.545837	1.88162e-24	118.37	T	MLVES(0.11)S(0.424)NT(0.546)HPS(0.921)PDDAFR	4208300	0	25
O54943	290	O54943	O54943	Period circadian protein homolog 2	Per2	>sp|O54943|PER2_MOUSE Period circadian protein homolog 2 OS=Mus musculus GN=Per2 PE=1 SV=3	0.999951	0.00590658	57.859	T	MT(1)PYLVK	2390400	0	26
